# Supplementary material for: Randomised-controlled feasibility trial on abdominal wall closure techniques in patients undergoing relaparotomy (ReLap study; DRKS00013001)
Source: Springer Nature journal article supplement (doi:10.1007/s00423-020-01903-1), 2020-06-01
Supplement: MOESM1 [file 18053706]

| Quality of life<br>EuroQol five-dimensional questionnaire | Preoperative                |                             |          | Hospital discharge          |                             |          | One Year                    |                             |          |
|-----------------------------------------------------------|-----------------------------|-----------------------------|----------|-----------------------------|-----------------------------|----------|-----------------------------|-----------------------------|----------|
|                                                           | Small<br>stitches<br>(n=50) | Large<br>stitches<br>(n=50) | p-value* | Small<br>stitches<br>(n=50) | Large<br>stitches<br>(n=50) | p-value* | Small<br>stitches<br>(n=40) | Large<br>stitches<br>(n=40) | p-value* |
| <b>Mobility</b>                                           |                             |                             |          |                             |                             |          |                             |                             |          |
| no problems                                               | 44 (88.0%)                  | 47 (94.0%)                  | 0.485    | 42 (84.0%)                  | 37 (74.0%)                  | 0.248    | 31 (77.5%)                  | 33 (82.5%)                  | 0.957    |
| some problems                                             | 6 (12.0%)                   | 3 (6.0%)                    |          | 8 (16.0%)                   | 11 (22.0%)                  |          | 8 (20.0%)                   | 7 (17.5%)                   |          |
| many problems                                             | 0 (0.0%)                    | 0 (0.0%)                    |          | 0 (0.0%)                    | 2 (4.0%)                    |          | 1 (2.5%)                    | 0 (0.0%)                    |          |
| <b>Independence</b>                                       |                             |                             |          |                             |                             |          |                             |                             |          |
| no problems                                               | 46 (92.0%)                  | 47 (94.0%)                  | > 0.999  | 44 (88.0%)                  | 41 (82.0%)                  | 0.630    | 29 (72.5%)                  | 37 (92.5%)                  | 0.039    |
| some problems                                             | 4 (8.0%)                    | 3 (6.0%)                    |          | 4 (8.0%)                    | 7 (14.0%)                   |          | 11 (27.5%)                  | 3 (7.5%)                    |          |
| many problems                                             | 0 (0.0%)                    | 0 (0.0%)                    |          | 2 (4.0%)                    | 2 (4.0%)                    |          | 0 (0.0%)                    | 0 (0.0%)                    |          |
| <b>Daily Tasks</b>                                        |                             |                             |          |                             |                             |          |                             |                             |          |
| no problems                                               | 34 (68.0%)                  | 37 (64.0%)                  | 0.428    | 25 (50.0%)                  | 24 (48.0%)                  | 0.936    | 19 (47.5%)                  | 20 (50.0%)                  | >0.999   |
| some problems                                             | 16 (32.0%)                  | 12 (24.0%)                  |          | 21 (42.0%)                  | 21 (42.0%)                  |          | 17 (42.5%)                  | 18 (45.0%)                  |          |
| many problems                                             | 0 (0.0%)                    | 1 (2.0%)                    |          | 4 (8.0%)                    | 5 (10.0%)                   |          | 4 (10.0%)                   | 2 (5.0%)                    |          |
| <b>Pain</b>                                               |                             |                             |          |                             |                             |          |                             |                             |          |
| no problems                                               | 32 (64.0%)                  | 27 (44.0%)                  | 0.475    | 27 (34.0%)                  | 23 (26.0%)                  | 0.301    | 24 (60.0%)                  | 19 (47.5%)                  | 0.417    |
| some problems                                             | 16 (32.0%)                  | 20 (40.0%)                  |          | 23 (26.0%)                  | 25 (50.0%)                  |          | 13 (32.5%)                  | 17 (42.5%)                  |          |
| many problems                                             | 2 (4.0%)                    | 3 (6.0%)                    |          | 0 (0.0%)                    | 2 (4.0%)                    |          | 3 (7.5%)                    | 4 (10.0%)                   |          |
| <b>Fear</b>                                               |                             |                             |          |                             |                             |          |                             |                             |          |
| no problems                                               | 25 (50.0%)                  | 28 (56.0%)                  | 0.858    | 31 (62.0%)                  | 26 (32.0%)                  | 0.311    | 19 (47.5%)                  | 22 (55.0%)                  | >0.999   |
| some problems                                             | 20 (40.0%)                  | 19 (38.0%)                  |          | 14 (28.0%)                  | 21 (42.0%)                  |          | 16 (40.0%)                  | 17 (42.5%)                  |          |
| many problems                                             | 5 (10.0%)                   | 3 (6.0%)                    |          | 5 (10.0%)                   | 3 (6.0%)                    |          | 5 (12.5%)                   | 1 (2.5%)                    |          |
| <b>Overall</b>                                            | 60.6 (20.3)                 | 66.1 (20.7)                 | 0.184    | 59.0 (21.5)                 | 58.2 (25.9)                 | 0.715    | 57.1 (23.2)                 | 68.1 (19.8)                 | 0.025    |

\*Categorical variables: Chi-squared test; continuous variables: student's t-test
